# Supplementary material
Source: ML conference proceedings conference paper supplement (https://proceedings.neurips.cc/paper_files/paper/2023/hash/c70741145c2c4f1d0c2e91b98729a49a-Abstract.html)
Supplement: Supplementary file 1 [file c70741145c2c4f1d0c2e91b98729a49a-Supplemental-Conference.zip]

Archive with 1 entries (1 files):
- appendix_final3.pdf
